# Supplementary material for: Displacement analysis of myocardial mechanical deformation (DIAMOND) reveals segmental susceptibility to doxorubicin-induced injury and regeneration
Source: JCI journal article supplement (doi:10.1172/jci.insight.125362), 2019-04-17
Supplement: sd1 [file 1]

## SUPPLEMENTAL INFORMATION

### SUPPLEMENTAL FIGURES

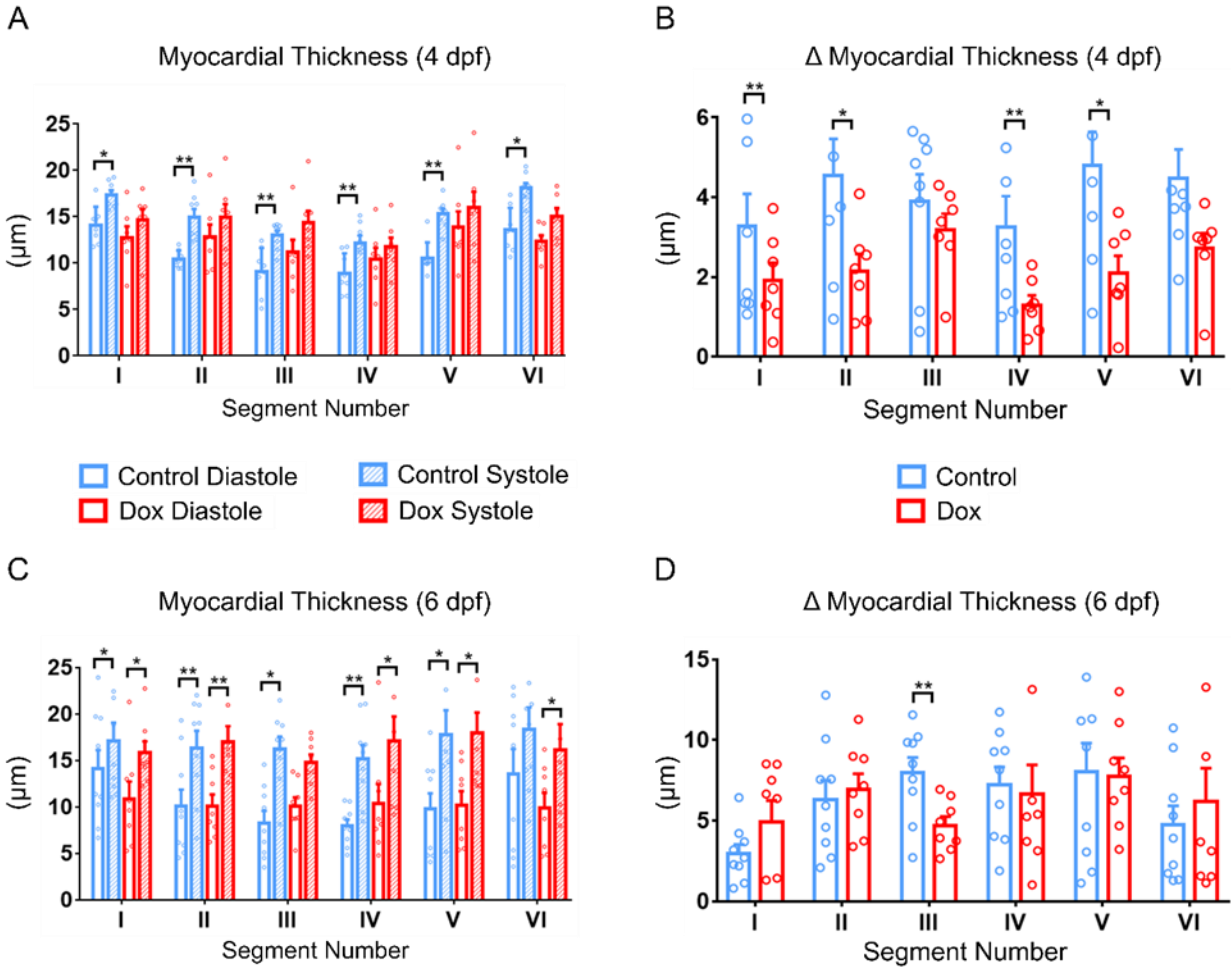

**Supplemental Figure S1. Segmental myocardial thickness following doxorubicin treatment.** (A, B) After 24 h of doxorubicin treatment (4 dpf), the difference in myocardial thickness between end-systole and end-diastole was significantly decreased compared to control. (C, D) Changes in myocardial thickness recovered in most segments 48 h after the end of chemotherapy exposure (6 dpf). Two-sided *t* tests, \*  $P < 0.05$ , \*\*  $P < 0.01$ ,  $n = 6-8$  per group.

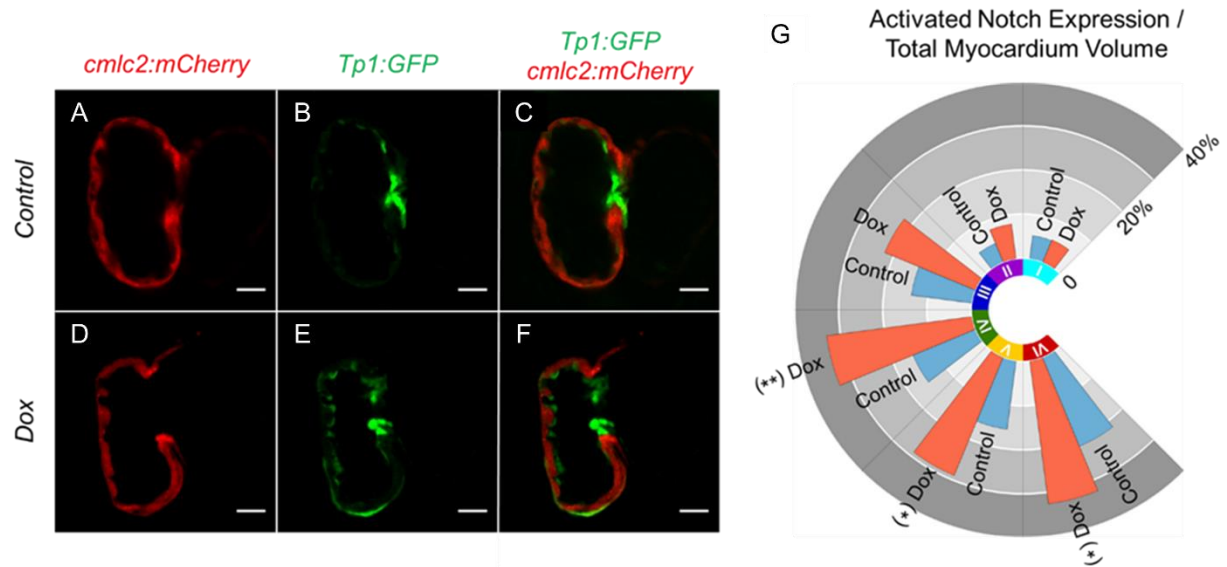

**Supplemental Figure S2. Segmental comparison of Notch activation normalized to myocardial volume.** (A-F) The *Tg(cmlc2:mCherry;Tp1:gfp)* line was imaged with confocal microscopy at 4 dpf. Notch activation was demonstrated by the green *Tp1-gfp* signal and the myocardium was delineated by the red *cmlc2-mCherry* signal. (G) Quantitative analysis of *Tp1-gfp* signal volume normalized to the segmental myocardium volume. Following 24-hour doxorubicin treatment, a robust increase in TP1 signal indicated enhanced Notch activity predominantly in segments IV – VI. Signals emanating from the atrioventricular valve were excluded from analyses. Two-sided *t* tests, \*  $P < 0.05$ , \*\*  $P < 0.01$ ,  $n = 6-8$  per group. Scale bar: 25  $\mu\text{m}$ .

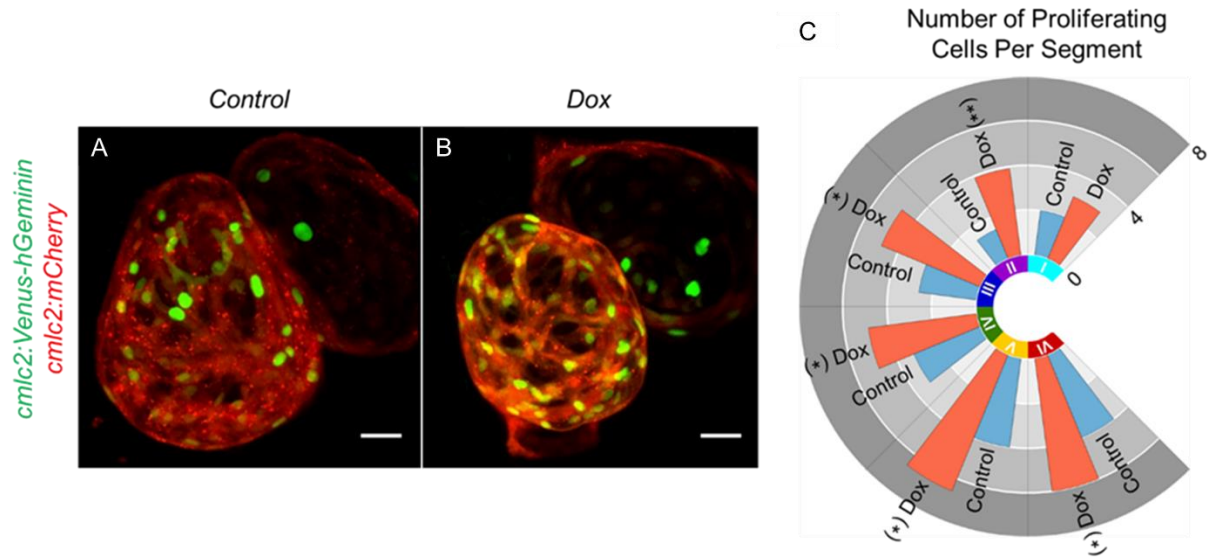

**Supplemental Figure S3. Segmental comparison of cardiomyocyte proliferation following chemo-induced injury.** Representative confocal microscopy images at 5 dpf, localizing proliferating cardiomyocytes (*cmlc2:Venus-hGeminin*, green) in the 3-D cardiac contour (*cmlc2:mCherry*, red) under control (**A**) and doxorubicin (**B**) conditions. (**C**) Quantitative analysis of segmental cardiomyocyte proliferation demonstrated a significant increase in segments II – VI following doxorubicin treatment. Two-sided *t* tests, \*  $P < 0.05$ , \*\*  $P < 0.01$ ,  $n = 6-8$  per group. Scale bar: 25  $\mu\text{m}$ .

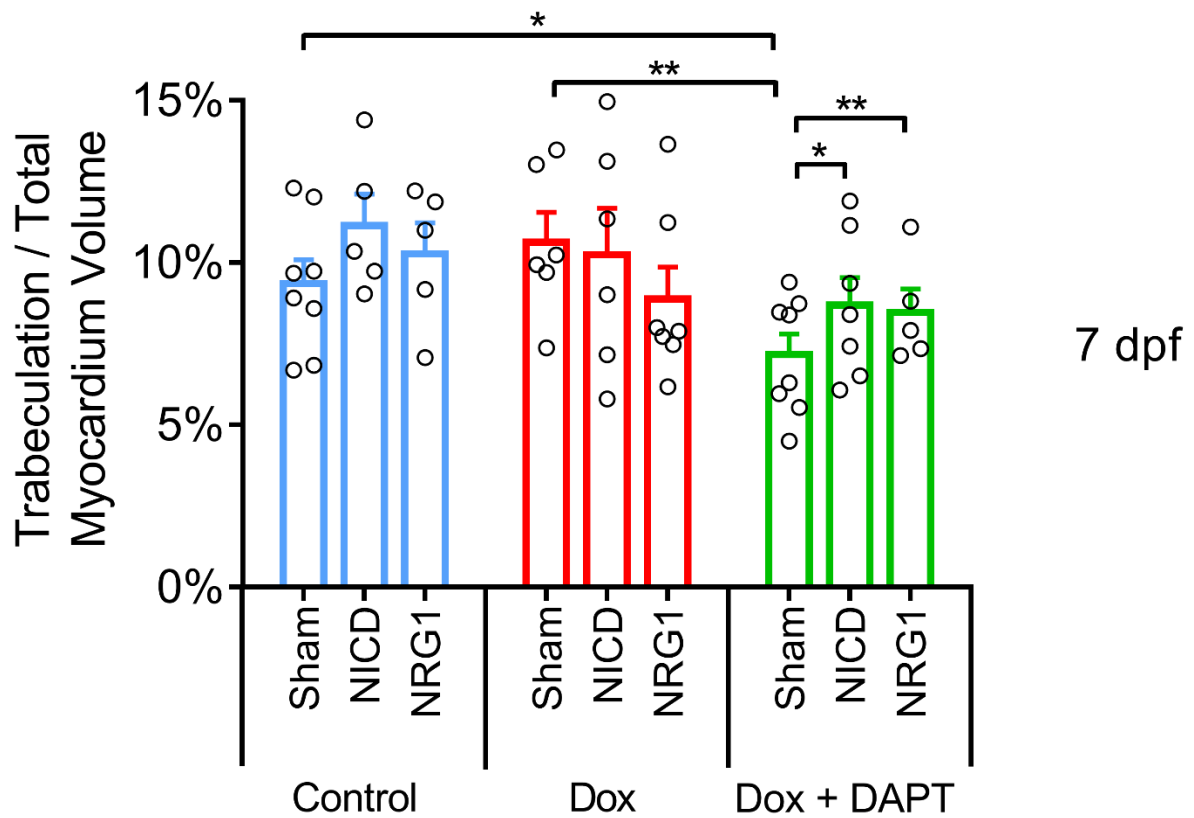

**Supplemental Figure S4. The 3-D cardiac trabecular architecture at 7 dpf in response to doxorubicin induced injury and genetic manipulation.** The restoration of trabecular network post chemo-induced injury remains attenuated by co-treatment with the Notch  $\gamma$ -secretase inhibitor DAPT at 7 dpf. Treatment with Notch downstream effectors *NICD* and *NRG1* rescues trabecular myocardium. ANOVA and Tukey's method, \*  $P < 0.05$ , \*\*  $P < 0.01$ ,  $n = 6-8$  per group.

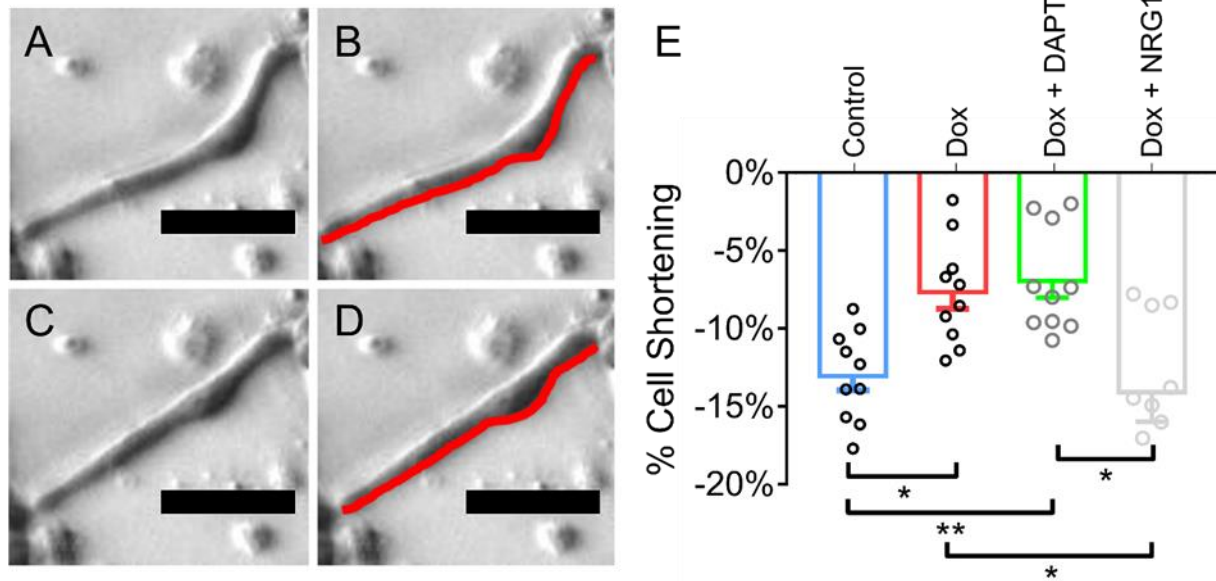

**Supplemental Figure S5. Contractile function of *ex vivo* adult zebrafish cardiomyocytes following doxorubicin treatment.** (A-B) Relaxed cardiomyocyte with length  $L_1$ . (C-D) Contracted cardiomyocyte with length  $L_2$ . (E) The percentage cell shortening of cardiomyocytes decreased significantly following doxorubicin treatment, and co-treatment of doxorubicin with DAPT. Overexpression of *NRG1* rescued the reduction of contractility. \*  $P < 0.05$ , \*\*  $P < 0.01$ ,  $n = 7-10$  per group. Scale bar: 30  $\mu\text{m}$ .



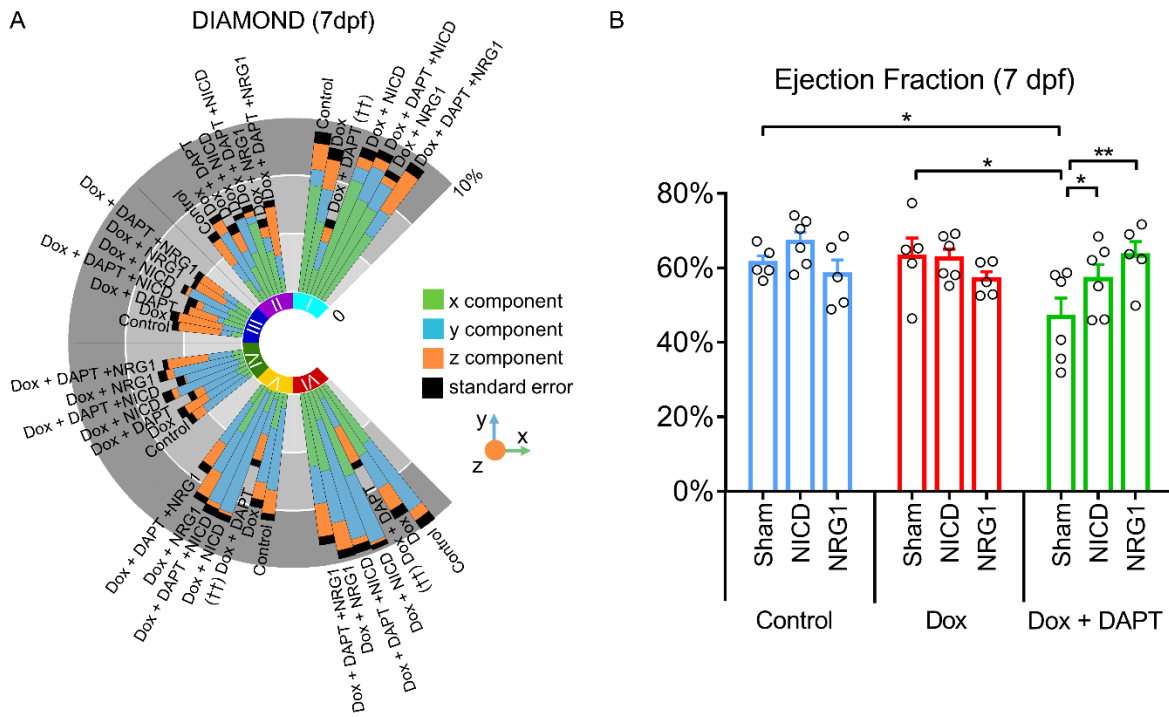

**Supplemental Figure S7. DIAMOND mechanics at 7 dpf for segmental localization and quantification of *NICD* and *NRG1* mRNA-mediated myocardial protection following doxorubicin-induced injury.** The inhibition of Notch signaling by the  $\gamma$ -secretase-inhibitor DAPT impaired the restoration of segmental (**A**, DIAMOND) and global (**B**, ejection fraction) cardiac function, a finding that was rescued *NICD* and *NRG1* mRNA treatment. ANOVA and Tukey's method, ††  $P < 0.01$  Dox + DAPT vs. control, \*  $P < 0.05$ , \*\*  $P < 0.01$ ,  $n = 6-10$  per group.

## SUPPLEMENTAL TABLES

|                                    | LSFM                   | Confocal           | OCT                  | $\mu$ CT | $\mu$ MRI                | $\mu$ PET             |
|------------------------------------|------------------------|--------------------|----------------------|----------|--------------------------|-----------------------|
| Fundamental Principle              | Laser with Light-Sheet | Laser with Pinhole | Optical Interference | X-ray    | Directional Proton Field | Positron Annihilation |
| Axial Resolution / Slice Thickness | +++                    | ++                 | ++                   | ++       | ++                       | +                     |
| Lateral / In-plane Resolution      | +++                    | +++                | ++                   | ++       | ++                       | +                     |
| Imaging Depth                      | ++                     | +                  | ++                   | +++      | +++                      | +++                   |
| Temporal Resolution                | +++                    | +                  | +++                  | +++      | ++                       | +                     |
| Molecular Labeling                 | +++                    | +++                | ++                   | +        | +                        | +++                   |
| <i>In vivo</i> Imaging             | +++                    | +                  | +++                  | +++      | +++                      | +++                   |
| Phototoxicity                      | +                      | +++                | ++                   | –        | –                        | –                     |

**Supplemental Table S1. Characteristics of imaging modalities.** A semi-quantitative scale ranging from + to +++ was used to compare key characteristics between imaging modalities.

**Legend.** LSFM: light-sheet fluorescent microscopy.  $\mu$ CT: micro-computerized tomography.  $\mu$ MRI: micro-magnetic resonance imaging.  $\mu$ PET: micro-positron emission tomography. OCT: optical coherence tomography. Scale. –: absent. +: low. ++: intermediate. +++: high.

**Supplemental Table S2. *NICD* mRNA sequence.**

TGTGGGGTGCTGCTGTCCCGCAAGCGCAGGCGGCAGCATGGCCAGCTCTGGTTCCCTGA  
GGGTTTCAAAGTGTGAGAGGCCAGCAAGAAGAAGCGGAGAGAACCCTCGGCGAGGACT  
CAGTCGGCCTCAAGCCCCTGAAGAACGCCTCAGATGGTGCCCTGATGGACGACAATCAGA  
ACGAGTGGGGGGACGAAGACCTGGAGACCAAGAAGTTCCGGTTTGAGGAACCAAGTGGTT  
CTCCCTGACCTGGATGATCAGACTGACCACCGGCAGTGGACCCAGCAGCACCTGGATGCC  
GCTGACCTACGTGTGTCTGCCATGGCCCCAACGCCGCTCAGGGGGAGGTAGATGCTGA  
CTGCATGGACGTCAATGTTTCGAGGACCAGATGGCTTCACTCCCCTAATGATTGCCTCCTGC  
AGCGGAGGGGGCCTGGAGACAGGCAACAGTGAAGGAAGAAGAAGATGCACCTGCTGTCAT  
CTCCGACTTCATCTATCAGGGTGCCAGCTTGCACAACCAGACGGACCGCACAGGGGAGAC  
TGCCCTGCACCTGGCTGCCCGATACTCTCGTTCAGATGCTGCCAAGCGCTTGCTGGAGGC  
CAGCGCAGATGCCAACATCCAAGACAACATGGGGCGTACCCCATACATGCCGCTGTTTC  
TGCAGACGCTCAGGGTGTCTTCCAGATCCTGCTCCGGAACAGAGCCACAGATCTGGATGC  
CCGAATGCATGATGGCACAACCCTCTGATCCTGGCGGCACGCCTGGCCGTGGAAGGCA  
TGCTAGAGGACCTCATCAACTCTCACGCTGATGTCAATGCTGTGGATGACCTAGGCAAGTC  
AGCTCTGCACTGGGCAGCCGCTGTGAACAATGTGGACGCTGCTGTTGTGCTCCTGAAGAA  
CGGAGCCAACAAAGACATGCAGAACAACAAGGAGGAGACTCCCCTGTTCCCTGGCCGCCC  
GTGAGGGCAGCTATGAGACTGCCAAAGTGTGCTGGACCACTTTGCCAACCAGGGACATCA  
CGGATCACATGGACCGATTGCCACGGGACATTGCACAGGAGCGCATGCACCACGATATCG  
TGCGGCTTTTGGATGAATAACAACCTGGTGCGCAGCCACAGCTGCATGGCACTGCCTTGG  
GTGGCACACCCACTCTGTCTCCACACTCTGCTCGCCCAACGGCTACCTGGGCAACCTCA  
AGTCTGCCACACAGGGCAAGAAGGCCCGAAAGCCAGCACCAAGGGCTGGCTTGCAGT  
AGCAAGGAAGCTAAGGACCTCAAGGCCCGGAGGAAGAAGTCCCAGGATGGCAAGGGCTG  
CCTGTTGGACAGCTCAAGCATGCTGTCACCCGTGGACTCCCTCGAGTCACCCCATGGCTA  
CTTGTGATGATGTGGCCTCACCAACCCTCCTTCCCTCCCCGTTCCAGCAGTCTCCATCCATG  
CCTCTCAGCCACCTGCCAGGTATGCCTGACACCCACCTGGGCATCAGCCACTTGAATGTG  
GCAGCCAAGCCCGAGATGGCAGCTCTGGCCGGAGGCAGCCGGTTGGCCTTTGAGCCACC  
CCCACCACGCCTCTCCACCTGCCTGTAGCCTCCAGTGCCAGCACAGTGTGAGTACCAA  
TGGCACAGGGGCTATGAATTTACCGTGGGTGCACCCGGCAAGCTTGAATGGCCAGTGTGA  
GTGGCTTCCCCGGCTCCAGAATGGCATGGTGCCAGCCAGTACAACCCGCTAAGGCCAG  
GTGTGACTCCGGGCACACTAAGCACACAGGCAGCTGGCCTCCAGCATGGCATGATGGGC  
CCGATACACAGCAGCCTCTCCACCAATACCTTGTCCCCGATTATCTACCAGGGCCTGCCCA  
ACACAAGGCTGGCCACACAGCCCCACCTGGTGCAGACCCAGCAGGTGCAGCCACAGAAC  
TTACAAATCCAGCCTCAGAACCTGCAGCCACCATCGCAGCCACACCTCAGTGTGAGCTCA  
GCAGCCAATGGGCACCTGGGTCCGAGCTTCCCTGAGCGGGGAGCCCAGCCAGGCAGACGT  
ACAGCCGCTGGGCCCCAGCAGTCTGCCTGTGCACACCATTCTGCCCCAGGAAAGCCAGG  
CTCTGCCGACATCACTGCCATCCTCCATGGTCCCACCCATGACCACTACCCAGTTCCTGAC  
CCCTCCTTCTCAGCACAGCTACTCATCCTCACCTGTGGACAACACCCCCAGCCACCAGCT  
GCAGGTGCCAGAGCACCCCTTCCCTCACCCCATCCCCTGAGTCCCCTGACCAGTGGTCCAG  
CTCCTCCCGGCATTCCAACATCTCTGATTGGTCCGAGGGCATCTCTAGCCCGCCCACGAG  
CATGCCGTCCCAGATCACCCACATTCCAGAGGCATTTAAGTAA

**Supplemental Table S3. *NRG1* mRNA sequence.**

ATGGAGATTTATTCCCCAGACATGTCTGAGGTCGCCGCCGAGAGGTCCTCCAGCCCCTCC  
ACTCAGCTGAGTGCAGACCCATCTCTTGATGGGCTTCCGGCAGCAGAAGACATGCCAGAG  
CCCCAGACTGAAGATGGGAGAACCCCTGGACTCGTGGGCCTGGCCGTGCCCTGCTGTGC  
GTGCCTAGAAGCTGAGCGCCTGAGAGGTTGCCTCAACTCAGAGAAAATCTGCATTGTCCC  
CATCCTGGCTTGCCTGGTCAGCCTCTGCCTCTGCATCGCCGGCCTCAAGTGGGTATTTGT  
GGACAAGATCTTTGAATATGACTCTCCTACTCACCTTGACCCTGGGGGGTTAGGCCAGGAC  
CCTATTATTTCTCTGGACGCAACTGCTGCCTCAGCTGTGTGGGTGTCGTCTGAGGCATACA  
CTTCACCTGTCTCTAGGGCTCAATCTGAAAGTGAGGTTCAAGTTACAGTGCAAGGTGACAA  
GGCTGTTGTCTCCTTTGAACCATCAGCGGCACCGACACCGAAGAATCGTATTTTTGCCTTT  
TCTTTCTTGCCGTCCACTGCGCCATCCTTCCCTTACCCACCCGGAACCCTGAGGTGAGAA  
CGCCCAAGTCAGCAACTCAGCCACAAACAACAGAACTAATCTCCAAACTGCTCCTAAACT  
TTCTACATCTACATCCACCACTGGGACAAGCCATCTTGTAATAATGTGCGGAGAAGGAGAAA  
ACTTTCTGTGTGAATGGAGGGGAGTGCTTCATGGTGAAAGACTTTTCAAACCCCTCGAGAT  
ACTTGTGCAAGTGCCCAAATGAGTTTACTGGTGATCGCTGCCAAAACCTACGTAATGGCCAG  
CTTCTACAGTACGTCCACTCCCTTTCTGTCTCTGCCTGAATAG

## **SUPPLEMENTAL VIDEOS**

**Supplemental Video S1. 4-D cardiac cycle with DIAMOND and raw data.**

**Supplemental Video S2. 4-D and time-dependent 2-D intracardiac views in control fish at 4 dpf.**

**Supplemental Video S3. 4-D and time-dependent 2-D intracardiac views in doxorubicin treated fish at 4 dpf.**

**Supplemental Video S4. 4-D and time-dependent 2-D intracardiac views in control fish at 6 dpf.**

**Supplemental Video S5. 4-D and time-dependent 2-D intracardiac views in doxorubicin treated fish at 4 dpf.**
